# Supplementary material
Source: publisher figshare collection journal article supplement (https://sage.figshare.com/ndownloader/files/14510198)
Supplement: Supplementary file 1 [file 14510198]

Running head: PSYCHOPATHY SUBTYPES AND THE FFM

Identifying Psychopathy Subtypes Using a Broader Model of Personality: An Investigation of the Five-Factor Model Using Model-Based Cluster Analysis

SUPPLEMENTAL MATERIAL

**Gender**

Table 1S

*Gender Comparisons*

| N=198 | Male  n=60 (30.3%) | ​ | Female  n=138 (69.7%) | ​ |  |
| --- | --- | --- | --- | --- | --- |
| ​ | M | SD | M | SD | F |
| NEO-N | 84.59 | 22.26 | 99.20 | 20.95 | *t*(196)= -4.43** |
| NEO-A | 106.37 | 20.08 | 106.04 | 18.22 | *t*(196)= .11 |
| NEO-C | 115.76 | 19.68 | 115.25 | 20.67 | *t*(196)= .16 |
| NEO-O | 115.51 | 15.02 | 115.99 | 16.10 | *t*(196)= -.196 |
| NEO-E | 118.89 | 18.41 | 118.15 | 17.61 | *t*(196)= .267 |
| PPI-I | 151.71 | 21.25 | 139.23 | 18.24 | *t*(196)= 4.21** |
| PPI-II | 189.66 | 31.34 | 190.52 | 28.34 | *t*(196)= -.19 |
| PPI-C | 42.52 | 5.58 | 39.43 | 5.21 | *t*(196)= 3.77** |
| AQ-Phy | 24.78 | 6.56 | 25.64 | 6.73 | *t*(196)= -.83 |
| AQ-Ver | 15.53 | 3.53 | 17.09 | 3.90 | *t*(196)= -2.66* |
| AQ-Ang | 17.85 | 5.25 | 19.93 | 5.72 | *t*(196)= -2.41* |
| AQ-Hos | 21.96 | 6.06 | 23.34 | 6.17 | *t*(196)= -1.44 |
| AQ | 80.12 | 17.06 | 86.00 | 19.04 | *t*(196)= -2.06* |
| NPI-O | 44.71 | 4.48 | 44.25 | 4.69 | *t*(196)= .65 |
| NPI-C | 16.75 | 2.22 | 16.54 | 2.27 | *t*(196)= .60 |
| ****p* < .001 ***p* < .01 **p* < .05 | ​ | ​ | ​ |  |  |

As noted in the paper, gender differences exist in this sample, with a higher percentage of men than women scoring in the top third of PPI-R scores. Similar gender differences are noted in the psychopathy literature (see Falkenbach, 2008 for an overview) and the psychopathy subtype research (Falkenbach et al., 2017; Hicks, et al., Lee & Salekin, 2010). In order to more closely examine gender differences in this study, t-tests were conducted with the full sample of male and female participants (who reported gender). Significant differences were indicated; male participants scored higher on PPI-I and Coldheartedness. Interestingly, and unexpectedly, Women reported more Neuroticism and Aggression total, including verbal and angry aggression specifically.
